# Supplementary material
Source: MDPI journal article supplement (https://www.mdpi.com/2673-5318/3/4/29)
Supplement: s1 [file s1]

Supplementary Table S1. Correlation matrix of items' scores.

|        | Item1   | Item2   | Item3   | Item4   | Item5   | Item6   | Item7   | Item8   | Item9   | Item10 | Item11  | Item12  | Item13 | Item14  | Item15  | Item16  | Item17 | Item18 | Item19 | Item20 |
|--------|---------|---------|---------|---------|---------|---------|---------|---------|---------|--------|---------|---------|--------|---------|---------|---------|--------|--------|--------|--------|
| Item1  | 1.00    |         |         |         |         |         |         |         |         |        |         |         |        |         |         |         |        |        |        |        |
| Item2  | 0.5423  | 1.00    |         |         |         |         |         |         |         |        |         |         |        |         |         |         |        |        |        |        |
| Item3  | 0.2071  | 0.2442  | 1.00    |         |         |         |         |         |         |        |         |         |        |         |         |         |        |        |        |        |
| Item4  | -0.0508 | 0.1386  | 0.4011  | 1.00    |         |         |         |         |         |        |         |         |        |         |         |         |        |        |        |        |
| Item5  | 0.1549  | 0.2557  | 0.5227  | 0.3081  | 1.00    |         |         |         |         |        |         |         |        |         |         |         |        |        |        |        |
| Item6  | 0.1559  | 0.3183  | 0.3905  | 0.4725  | 0.4888  | 1.00    |         |         |         |        |         |         |        |         |         |         |        |        |        |        |
| Item7  | 0.3041  | 0.4843  | 0.3415  | 0.2429  | 0.1364  | 0.2834  | 1.00    |         |         |        |         |         |        |         |         |         |        |        |        |        |
| Item8  | 0.1075  | 0.3048  | 0.4388  | 0.4221  | 0.2936  | 0.4168  | 0.2858  | 1.00    |         |        |         |         |        |         |         |         |        |        |        |        |
| Item9  | 0.2559  | 0.2288  | 0.3748  | 0.2100  | 0.5635  | 0.3135  | 0.0127  | 0.3078  | 1.00    |        |         |         |        |         |         |         |        |        |        |        |
| Item10 | 0.4527  | 0.2194  | 0.0136  | -0.0720 | 0.0666  | -0.0329 | 0.1377  | -0.1804 | 0.1690  | 1.00   |         |         |        |         |         |         |        |        |        |        |
| Item11 | 0.2701  | 0.4936  | 0.4031  | 0.3014  | 0.4340  | 0.3763  | 0.2624  | 0.4928  | 0.4436  | 0.1067 | 1.00    |         |        |         |         |         |        |        |        |        |
| Item12 | 0.1972  | 0.3769  | 0.4349  | 0.2734  | 0.4683  | 0.2600  | 0.2664  | 0.4146  | 0.3842  | 0.0205 | 0.6940  | 1.00    |        |         |         |         |        |        |        |        |
| Item13 | 0.3309  | 0.3580  | -0.0417 | -0.0496 | 0.0029  | 0.1209  | 0.2367  | 0.0011  | 0.1213  | 0.2896 | 0.1645  | 0.0634  | 1.00   |         |         |         |        |        |        |        |
| Item14 | 0.2184  | 0.2155  | 0.0317  | -0.2271 | -0.1059 | 0.0086  | 0.1974  | -0.0555 | -0.0161 | 0.2929 | -0.0735 | -0.0387 | 0.5401 | 1.00    |         |         |        |        |        |        |
| Item15 | 0.0070  | -0.1597 | -0.1238 | -0.3121 | -0.1915 | -0.3726 | -0.1519 | -0.2560 | -0.2291 | 0.1695 | -0.2813 | -0.1402 | 0.0804 | 0.1931  | 1.00    |         |        |        |        |        |
| Item16 | 0.1574  | 0.0611  | -0.0419 | -0.2318 | -0.0834 | -0.1396 | -0.0198 | -0.2099 | 0.0161  | 0.4304 | -0.0228 | -0.0528 | 0.3078 | 0.5448  | 0.5199  | 1.00    |        |        |        |        |
| Item17 | 0.2268  | 0.4007  | 0.3448  | 0.2390  | 0.3740  | 0.3269  | 0.1513  | 0.3359  | 0.3899  | 0.0922 | 0.3956  | 0.4390  | 0.0897 | 0.0639  | 0.0044  | 0.0849  | 1.00   |        |        |        |
| Item18 | 0.3593  | 0.3403  | 0.0806  | 0.1117  | 0.1228  | 0.1254  | 0.2526  | 0.0509  | 0.1976  | 0.3041 | 0.1776  | 0.0639  | 0.4595 | 0.2370  | 0.0694  | 0.2342  | 0.1361 | 1.00   |        |        |
| Item19 | 0.1330  | 0.2704  | 0.4039  | 0.2850  | 0.4565  | 0.3361  | 0.2670  | 0.3953  | 0.3981  | 0.0219 | 0.2939  | 0.4573  | 0.0189 | -0.0136 | -0.2048 | -0.1229 | 0.2944 | 0.0185 | 1.00   |        |
| Item20 | -0.0102 | 0.1751  | 0.1178  | 0.2081  | 0.3024  | 0.2570  | 0.1783  | 0.2012  | 0.2480  | 0.0806 | 0.1682  | 0.2170  | 0.2145 | -0.0287 | -0.1488 | -0.0303 | 0.2409 | 0.1425 | 0.3096 | 1.00   |

Correlations were estimated by Spearman correlation coefficient to account for the Likert structure of data. Orange: coefficients >|0.5|. Beige: coefficients between |0.2| and |0.5|. Blue: coefficients <|0.2|
